# Supplementary material
Source: PubMed Central journal article supplement (PMC6290136)
Supplement: supp_RA118.005695_140575_1_supp_213264_pg06v6.pdf [file supp_RA118.005695_140575_1_supp_213264_pg06v6.pdf]

## Supporting Information

### **Mechanistic basis for the evolution of chalcone synthase catalytic cysteine reactivity in land plants**

**Geoffrey Liou<sup>1,2</sup>, Ying-Chih Chiang<sup>3</sup>, Yi Wang<sup>3</sup>, and Jing-Ke Weng<sup>1,2,\*</sup>**

From the <sup>1</sup>Department of Biology, Massachusetts Institute of Technology, Cambridge, MA 02139, USA;  
<sup>2</sup>Whitehead Institute for Biomedical Research, Cambridge, MA 02142, USA; <sup>3</sup>Department of Physics,  
The Chinese University of Hong Kong, Shatin, NT, Hong Kong

Running title: *Evolution of chalcone synthase cysteine reactivity*

\*To whom correspondence should be addressed:

Jing-Ke Weng: Whitehead Institute for Biomedical Research, Cambridge, MA 02142, USA;  
[wengj@wi.mit.edu](mailto:wengj@wi.mit.edu), Tel. (617) 324-4921

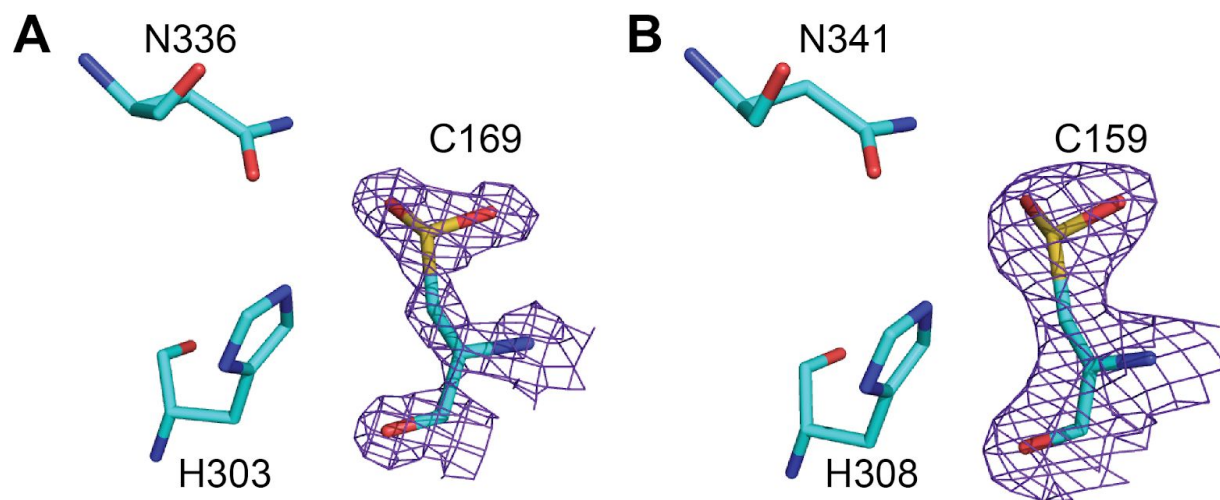

**Figure S1.** Active site structures of *Medicago sativa* CHS (**A**) (PDB ID 1BI5) and *Gerbera hybrida* 2-pyrone synthase (**B**) (PDB ID 1QLV) showing catalytic cysteine oxidized to sulfinic acid. The 2F<sub>o</sub>-F<sub>c</sub> composite map contoured at 1.5σ is shown around the catalytic cysteine.

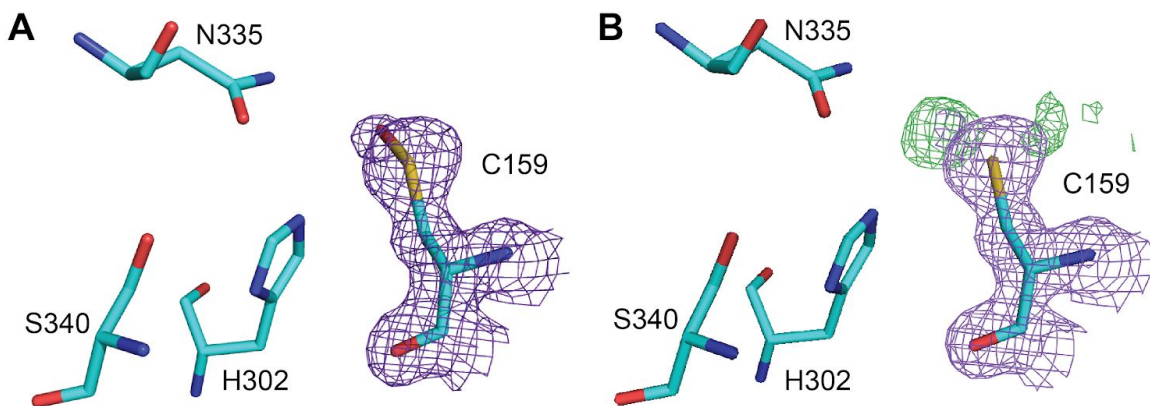

**Figure S2.** Active site structure of SmCHS crystals soaked in 1 mM hydrogen peroxide for 75 min. **A**, The 2F<sub>o</sub>-F<sub>c</sub> composite map to 1.55 Å resolution and contoured at 1.5σ is shown around the catalytic cysteine, modeled as oxidized to sulfenic acid. **B**, The 2F<sub>o</sub>-F<sub>c</sub> composite map to 1.55 Å resolution and contoured at 1.5σ is shown as purple and the F<sub>o</sub>-F<sub>c</sub> difference map contoured at 3.0σ is shown as green around the catalytic cysteine, modeled as reduced cysteine, indicating clear residual electron density for the oxidized sulfenic acid.

|                            |                                            |
|----------------------------|--------------------------------------------|
|                            | SmCHS H <sub>2</sub> O <sub>2</sub> 75 min |
| PDB ID                     | 6DXF                                       |
| <b>Data collection</b>     |                                            |
| Total reflections          | 404281 (37428)                             |
| Unique reflections         | 108309 (10712)                             |
| Multiplicity               | 3.7 (3.5)                                  |
| Completeness (%)           | 98.71 (98.24)                              |
| Mean I/sigma(I)            | 11.08 (1.66)                               |
| R-merge                    | 0.08912 (0.825)                            |
| CC1/2                      | 0.996 (0.532)                              |
| <b>Refinement</b>          |                                            |
| Resolution range (Å)       | 102.9 - 1.55<br>(1.605 - 1.55)             |
| Space group                | P 1 21 1                                   |
| Unit cell (Å)              | 55.54 67.064 102.993                       |
| Unit cell (°)              | 90 91.719 90                               |
| R-work                     | 0.1550 (0.2771)                            |
| R-free                     | 0.1834 (0.3058)                            |
| Non-hydrogen protein atoms | 5807                                       |
| Water molecules            | 686                                        |
| RMSD bonds (Å)             | 0.01                                       |
| RMSD angles (°)            | 1.25                                       |
| Ramachandran favored (%)   | 97.32                                      |
| Ramachandran allowed (%)   | 2.54                                       |
| Ramachandran outliers (%)  | 0.13                                       |
| Average B-factor           | 24.03                                      |

**Table S1.** Statistics for crystal structure of SmCHS crystals soaked in 1 mM hydrogen peroxide for 75 minutes. The highest-resolution shell values are given in parentheses.

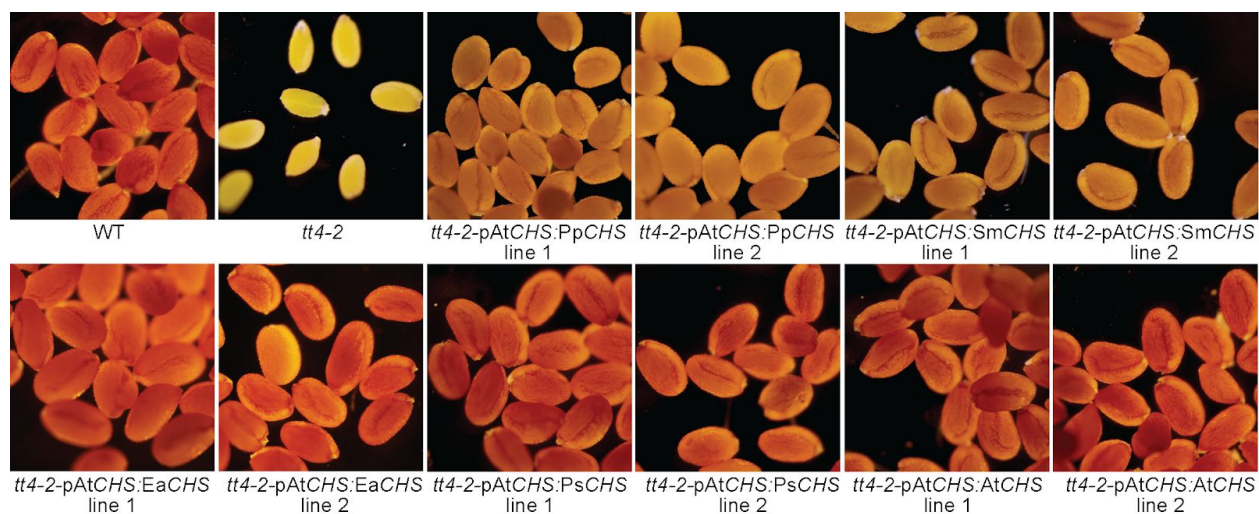

**Figure S3.** Complementation of the *transparent testa* seed phenotype of *tt4-2* mutant *Arabidopsis thaliana*. CHS orthologs were expressed under the *AtCHS* promoter. CHS from ephylllophytes (*AtCHS*, *PsCHS*, *EaCHS*) fully complement the mutant phenotype, whereas CHS from basal land plants (*SmCHS*, *PpCHS*) only partially complement.

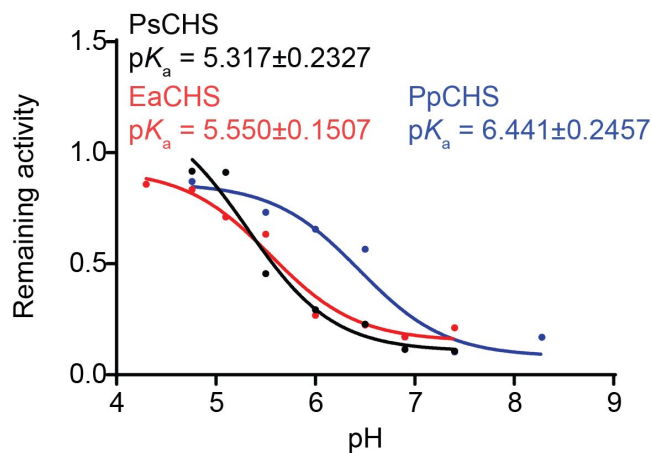

**Figure S4.**  $pK_a$  measurement of PsCHS, EaCHS, and PpCHS wild type enzymes. CHS enzyme was pre-incubated at various pH in the 25  $\mu$ M iodoacetamide inhibitor or water (control) for 30 s, and an aliquot was taken to run in a CHS activity assay. The ratio of naringenin product produced in the iodoacetamide treatment divided by the control treatment was calculated for each pH point. A nonlinear regression was performed to fit a log(inhibitor) vs. response curve to determine the pH at which 50% of maximal inhibition was achieved, which was determined to be the  $pK_a$  of the catalytic cysteine residue. The  $pK_a$  of PsCHS and EaCHS are close to the 5.5 determined for other euphylllophyte CHSs, whereas the  $pK_a$  of PpCHS is over 1 pH unit higher, similar to that of SmCHS.

Catalytic Cys

|                                            |    |             |           |     |                       |
|--------------------------------------------|----|-------------|-----------|-----|-----------------------|
| Plagiocchila asplenoides_CHS               | 58 | ALRAAKFRFRD | OKDSGLTKK | 164 | VMMWQGGCFPGAGSVTRVAKD |
| Lejeuneaceae_sp_CHS                        | 39 | ELKFKKFRFRD | ERSSGTKK  | 145 | VMMWQGGCFPGAAAVTRVAKD |
| Porella pinnata_CHS                        | 61 | ELKFKKFRFRD | OKDSGLTKK | 167 | VMMWQGGCFPGAAVTRVAKD  |
| Porella navicularis_CHS                    | 53 | ELKFKKFRFRD | OKDSGLTKK | 159 | VMMWQGGCFPGAAVTRVAKD  |
| Radula lindenbergia_CHS                    | 56 | DLKFKKFRFRD | EKSGTKK   | 162 | VMMWQGGCFPGAAVTRVAKD  |
| Sphaerocarpos texanus_CHS                  | 56 | DMKKKFRFRD  | EKSGTKK   | 162 | VMMWQGGCFPGAAVTRVAKD  |
| Physcomitrella patens_CHS1                 | 57 | ALRAAKFRFRD | OKDSGLTKK | 163 | VMMWQGGCFPGAGSVTRVAKD |
| Physcomitrella patens_CHS2                 | 57 | ALRAAKFRFRD | OKDSGLTKK | 163 | VMMWQGGCFPGAGSVTRVAKD |
| Physcomitrella patens_CHS3                 | 57 | ALRAAKFRFRD | OKDSGLTKK | 163 | VMMWQGGCFPGAGSVTRVAKD |
| Physcomitrella patens_CHS4                 | 50 | ALRAAKFRFRD | OKDSGLTKK | 156 | VMMWQGGCFPGAGSVTRVAKD |
| Physcomitrella patens_CHS5                 | 50 | ALRAAKFRFRD | OKDSGLTKK | 156 | VMMWQGGCFPGAGSVTRVAKD |
| Physcomitrella patens_CHS6                 | 50 | ALHAAKFRFRD | OKDSGLTKK | 156 | VMMWQGGCFPGAGSVTRVAKD |
| Physcomitrella patens_CHS7                 | 50 | ALHAAKFRFRD | OKDSGLTKK | 156 | VMMWQGGCFPGAGSVTRVAKD |
| Physcomitrella patens_CHS8                 | 50 | ALHAAKFRFRD | OKDSGLTKK | 156 | VMMWQGGCFPGAGSVTRVAKD |
| Physcomitrella patens_CHS9                 | 63 | ALRAAKFRFRD | OKDSGLTKK | 169 | VMMWQGGCFPGAGSVTRVAKD |
| Physcomitrella patens_CHS10                | 63 | ALRAAKFRFRD | OKDSGLTKK | 169 | VMMWQGGCFPGAGSVTRVAKD |
| Physcomitrella patens_CHS11                | 63 | ALRAAKFRFRD | OKDSGLTKK | 169 | VMMWQGGCFPGAGSVTRVAKD |
| Physcomitrella patens_CHS12                | 63 | ALRAAKFRFRD | OKDSGLTKK | 169 | VMMWQGGCFPGAGSVTRVAKD |
| Physcomitrella patens_CHS13                | 63 | ALRAAKFRFRD | OKDSGLTKK | 169 | VMMWQGGCFPGAGSVTRVAKD |
| Tetraphis pellucida_CHS                    | 47 | ALRAAKFRFRD | OKDSGLTKK | 153 | VMMWQGGCFPGAGSVTRVAKD |
| Trichum angustatum_CHS                     | 61 | ALRAAKFRFRD | OKDSGLTKK | 158 | VMMWQGGCFPGAGSVTRVAKD |
| Buxbaumia aphylla_CHS                      | 71 | ALKSKFRFRD  | OKDSGLTKK | 176 | VMMWQGGCFPGAGSVTRVAKD |
| Leucobryum albidum_CHS                     | 50 | ALRAAKFRFRD | OKDSGLTKK | 176 | VMMWQGGCFPGAGSVTRVAKD |
| Timmia austriaca_CHS1                      | 66 | ALKGGFRFRD  | OKDSGLTKK | 172 | VMMWQGGCFPGAGSVTRVAKD |
| Dicranum scoparium_CHS                     | 50 | ALRAAKFRFRD | OKDSGLTKK | 156 | VMMWQGGCFPGAGSVTRVAKD |
| Timmia austriaca_CHS2                      | 42 | ALKGGFRFRD  | OKDSGLTKK | 148 | VMMWQGGCFPGATVTRVAKD  |
| Ceratodon purpureus_CHS                    | 47 | ALKGGFRFRD  | OKDSGLTKK | 153 | VMMWQGGCFPGATVTRVAKD  |
| Rosulabryum cf capillare_CHS1              | 61 | ALKGGFRFRD  | EKSGTKK   | 167 | VMMWQGGCFPGATVTRVAKD  |
| Rosulabryum cf capillare_CHS2              | 67 | ALKGGFRFRD  | EKSGTKK   | 173 | VMMWQGGCFPGATVTRVAKD  |
| Philonotis fontana_CHS                     | 72 | ALKGGFRFRD  | EKSGTKK   | 178 | VMMWQGGCFPGATVTRVAKD  |
| Hedwigia ciliata_CHS                       | 72 | ALKGGFRFRD  | EKSGTKK   | 178 | VMMWQGGCFPGATVTRVAKD  |
| Rhynchostegium serrulatum_CHS              | 49 | ALRAAKFRFRD | OKDSGLTKK | 155 | VMMWQGGCFPGATVTRVAKD  |
| Anomodon attenuatus_CHS                    | 71 | ALKGGFRFRD  | EKSGTKK   | 177 | VMMWQGGCFPGATVTRVAKD  |
| Pseudotaxiphylum elegans_CHS               | 71 | ALKGGFRFRD  | EKSGTKK   | 177 | VMMWQGGCFPGATVTRVAKD  |
| Leucodon julaceus_CHS                      | 75 | ALKGGFRFRD  | EKSGTKK   | 181 | VMMWQGGCFPGATVTRVAKD  |
| Leucodon brachyopus_CHS                    | 74 | ALKGGFRFRD  | EKSGTKK   | 180 | VMMWQGGCFPGATVTRVAKD  |
| Loeskeobryum brevifrostre_CHS              | 71 | ALKGGFRFRD  | EKSGTKK   | 175 | VMMWQGGCFPGATVTRVAKD  |
| Climacium dendroides_CHS                   | 71 | ALKGGFRFRD  | EKSGTKK   | 177 | VMMWQGGCFPGATVTRVAKD  |
| Fontinalis antipyretica_CHS                | 71 | ALKGGFRFRD  | EKSGTKK   | 173 | VMMWQGGCFPGATVTRVAKD  |
| Claopodium rostratum_CHS                   | 71 | ALKGGFRFRD  | EKSGTKK   | 177 | VMMWQGGCFPGATVTRVAKD  |
| Thuidium delicatulum_CHS                   | 71 | ALKGGFRFRD  | EKSGTKK   | 177 | VMMWQGGCFPGATVTRVAKD  |
| Stereodon subimponens_CHS                  | 71 | ALKGGFRFRD  | EKSGTKK   | 177 | VMMWQGGCFPGATVTRVAKD  |
| Selaginella moellendorffii_CHS             | 46 | ELKFKKFRFRD | OKDSGLTKK | 152 | VMMWQGGCFPGATVTRVAKD  |
| Selaginella stantoniiana_CHS               | 46 | ELKFKKFRFRD | OKDSGLTKK | 152 | VMMWQGGCFPGATVTRVAKD  |
| Selaginella lepidophylla_CHS               | 46 | DLKFKKFRFRD | OKDSGLTKK | 152 | VMMWQGGCFPGATVTRVAKD  |
| Selaginella apoda_CHS                      | 46 | ELKSKFRFRD  | OKDSGLTKK | 152 | VMMWQGGCFPGATVTRVAKD  |
| Selaginella willdenowii_CHS                | 45 | ELKGGFRFRD  | OKDSGLTKK | 151 | VMMWQGGCFPGATVTRVAKD  |
| Selaginella kraussiana_CHS                 | 46 | ALKSKFRFRD  | OKDSGLTKK | 152 | VMMWQGGCFPGATVTRVAKD  |
| Selaginella acanthonota_CHS                | 35 | ELKFKKFRFRD | OKDSGLTKK | 141 | VMMWQGGCFPGATVTRVAKD  |
| Selaginella wallacei_CHS                   | 35 | ELKFKKFRFRD | OKDSGLTKK | 141 | VMMWQGGCFPGATVTRVAKD  |
| Selaginella selaginoides_CHS               | 37 | DMKSKFRFRD  | OKDSGLTKK | 143 | VMMWQGGCFPGATVTRVAKD  |
| Isoetes sp CHS                             | 40 | ELKGGFRFRD  | OKDSGLTKK | 146 | VMMWQGGCFPGATVTRVAKD  |
| Isoetes tegetiformans_CHS                  | 40 | ELKGGFRFRD  | OKDSGLTKK | 146 | VMMWQGGCFPGATVTRVAKD  |
| Pseudolycopodiella caroliniana_CHS         | 37 | ELKFKKFRFRD | OKDSGLTKK | 143 | VMMWQGGCFPGATVTRVAKD  |
| Lycopodiella appressa_CHS                  | 37 | DLKFKKFRFRD | OKDSGLTKK | 143 | VMMWQGGCFPGATVTRVAKD  |
| Lycopodium annotinum_CHS                   | 37 | ELKFKKFRFRD | OKDSGLTKK | 143 | VMMWQGGCFPGATVTRVAKD  |
| Diphasiastrum digitatum_CHS                | 37 | ELKFKKFRFRD | OKDSGLTKK | 143 | VMMWQGGCFPGATVTRVAKD  |
| Dendrolycopodium obscurum_CHS              | 37 | ELKFKKFRFRD | OKDSGLTKK | 143 | VMMWQGGCFPGATVTRVAKD  |
| Huperzia myrsinoides_CHS                   | 37 | ELKFKKFRFRD | OKDSGLTKK | 143 | VMMWQGGCFPGATVTRVAKD  |
| Huperzia lucidula_CHS                      | 37 | ELKFKKFRFRD | OKDSGLTKK | 143 | VMMWQGGCFPGATVTRVAKD  |
| Equisetum arvense_CHS                      | 57 | ELKFKKFRFRD | OKDSGLTKK | 163 | VMMWQGGCFPGATVTRVAKD  |
| Psilotum nudum_CHS                         | 49 | ELKFKKFRFRD | EKSGTKK   | 155 | VMMWQGGCFPGCTAVTRVAKD |
| Ceratopteris thalictroides_CHS             | 57 | DLKFKKFRFRD | OKDSGLTKK | 163 | VMMWQGGCFPGCTAVTRVAKD |
| Dryopteris erythrosora_CHS                 | 59 | DLKFKKFRFRD | OKDSGLTKK | 165 | VMMWQGGCFPGCTAVTRVAKD |
| Pinus sylvestris_CHS                       | 56 | ELKFKKFRFRD | OKDSGLTKK | 162 | VMMWQGGCFPGCTAVTRVAKD |
| Stangeria eriopus_CHS                      | 51 | ELKFKKFRFRD | EKSGTKK   | 157 | VMMWQGGCFPGCTAVTRVAKD |
| Eucephalartos barberi_CHS                  | 51 | ELKFKKFRFRD | EKSGTKK   | 157 | VMMWQGGCFPGCTAVTRVAKD |
| Cycas micholitzii_CHS                      | 48 | ELKFKKFRFRD | EKSGTKK   | 154 | VMMWQGGCFPGCTAVTRVAKD |
| Ginkgo biloba_CHS                          | 44 | ELKFKKFRFRD | EKSGTKK   | 150 | VMMWQGGCFPGCTAVTRVAKD |
| Gnetum montanum_CHS                        | 45 | ELKFKKFRFRD | OKDSGLTKK | 151 | VMMWQGGCFPGCTAVTRVAKD |
| Welwitschia mirabilis_CHS                  | 50 | DLKFKKFRFRD | OKDSGLTKK | 156 | VMMWQGGCFPGCTAVTRVAKD |
| Elaeis guineensis_CHS2                     | 53 | DLKFKKFRFRD | OKDSGLTKK | 159 | VMMWQGGCFPGCTAVTRVAKD |
| Sorghum bicolor_CHS                        | 55 | ELKFKKFRFRD | OKDSGLTKK | 161 | VMMWQGGCFPGCTAVTRVAKD |
| Phoenix dactylifera_CHS1                   | 51 | DLKFKKFRFRD | OKDSGLTKK | 157 | VMMWQGGCFPGCTAVTRVAKD |
| Setaria italica_CHS2                       | 55 | DLKFKKFRFRD | OKDSGLTKK | 161 | VMMWQGGCFPGCTAVTRVAKD |
| Musa acuminata_subsp_malaccensis_CHS2-like | 51 | ELKFKKFRFRD | OKDSGLTKK | 154 | VMMWQGGCFPGCTAVTRVAKD |
| Zea mays_CHS                               | 55 | DLKFKKFRFRD | OKDSGLTKK | 161 | VMMWQGGCFPGCTAVTRVAKD |
| Brachypodium distachyon_CHS                | 55 | DLKFKKFRFRD | OKDSGLTKK | 161 | VMMWQGGCFPGCTAVTRVAKD |
| Setaria italica_CHS1-like                  | 54 | ELKFKKFRFRD | OKDSGLTKK | 160 | VMMWQGGCFPGCTAVTRVAKD |
| Oryza sativa_Japonica_Group_CHS2           | 55 | NLKFKKFRFRD | OKDSGLTKK | 161 | VMMWQGGCFPGCTAVTRVAKD |
| Arabidopsis thaliana_CHS                   | 56 | DLKFKKFRFRD | OKDSGLTKK | 162 | VMMWQGGCFPGCTAVTRVAKD |
| Arabidopsis halleri_CHS                    | 51 | ELKFKKFRFRD | OKDSGLTKK | 157 | VMMWQGGCFPGCTAVTRVAKD |
| Medicago sativa_CHS                        | 51 | ELKFKKFRFRD | OKDSGLTKK | 157 | VMMWQGGCFPGCTAVTRVAKD |
| Camelina sativa_CHS                        | 56 | DLKFKKFRFRD | OKDSGLTKK | 162 | VMMWQGGCFPGCTAVTRVAKD |
| Brassica oleracea_var_oleracea_CHS3        | 56 | DLKFKKFRFRD | OKDSGLTKK | 162 | VMMWQGGCFPGCTAVTRVAKD |
| Eutrema salsugineum_CHS                    | 56 | DLKFKKFRFRD | OKDSGLTKK | 162 | VMMWQGGCFPGCTAVTRVAKD |
| Glycine max_CHS_J-like                     | 51 | DLKFKKFRFRD | OKDSGLTKK | 157 | VMMWQGGCFPGCTAVTRVAKD |
| Populus euphratica_CHS                     | 52 | ELKFKKFRFRD | OKDSGLTKK | 158 | VMMWQGGCFPGCTAVTRVAKD |
| Citrus sinensis_CHS1_isoform_X1            | 51 | DLKFKKFRFRD | OKDSGLTKK | 157 | VMMWQGGCFPGCTAVTRVAKD |
| Theobroma cacao_CHS                        | 53 | ELKFKKFRFRD | OKDSGLTKK | 159 | VMMWQGGCFPGCTAVTRVAKD |
| Vitis vinifera_CHS                         | 51 | ELKFKKFRFRD | OKDSGLTKK | 157 | VMMWQGGCFPGCTAVTRVAKD |
| Populus trichocarpa_CHS                    | 52 | ELKFKKFRFRD | OKDSGLTKK | 158 | VMMWQGGCFPGCTAVTRVAKD |
| Solanum pennellii_CHS2                     | 51 | ELKFKKFRFRD | OKDSGLTKK | 157 | VMMWQGGCFPGCTAVTRVAKD |
| Nicotiana tomentosiformis_CHS2             | 51 | ELKFKKFRFRD | OKDSGLTKK | 157 | VMMWQGGCFPGCTAVTRVAKD |
| Sesamum indicum_CHS                        | 51 | ELKFKKFRFRD | OKDSGLTKK | 157 | VMMWQGGCFPGCTAVTRVAKD |
| Erythranthe guttata_CHS                    | 53 | DLKFKKFRFRD | EKSGTKK   | 159 | VMMWQGGCFPGCTAVTRVAKD |
| Capsicum annuum_CHS1B                      | 51 | ELKFKKFRFRD | EKSGTKK   | 157 | VMMWQGGCFPGCTAVTRVAKD |

Basal land plants

Euphyllphytes

**Figure S5.** Multiple sequence alignment of CHSs. Sequence numbers of the beginning of each block for each CHS sequence are indicated. Residues outlined in thin black boxes are conserved with > 70% similarity across all sequences. Residues with 100% conservation are in white text with a black background. Red boxes indicate the seven positions mutated in the AtCHS M7 and SmCHS M7 constructs; these positions are differentially conserved between euphyllphyte and basal-plant CHSs, which are divided by the horizontal red line.





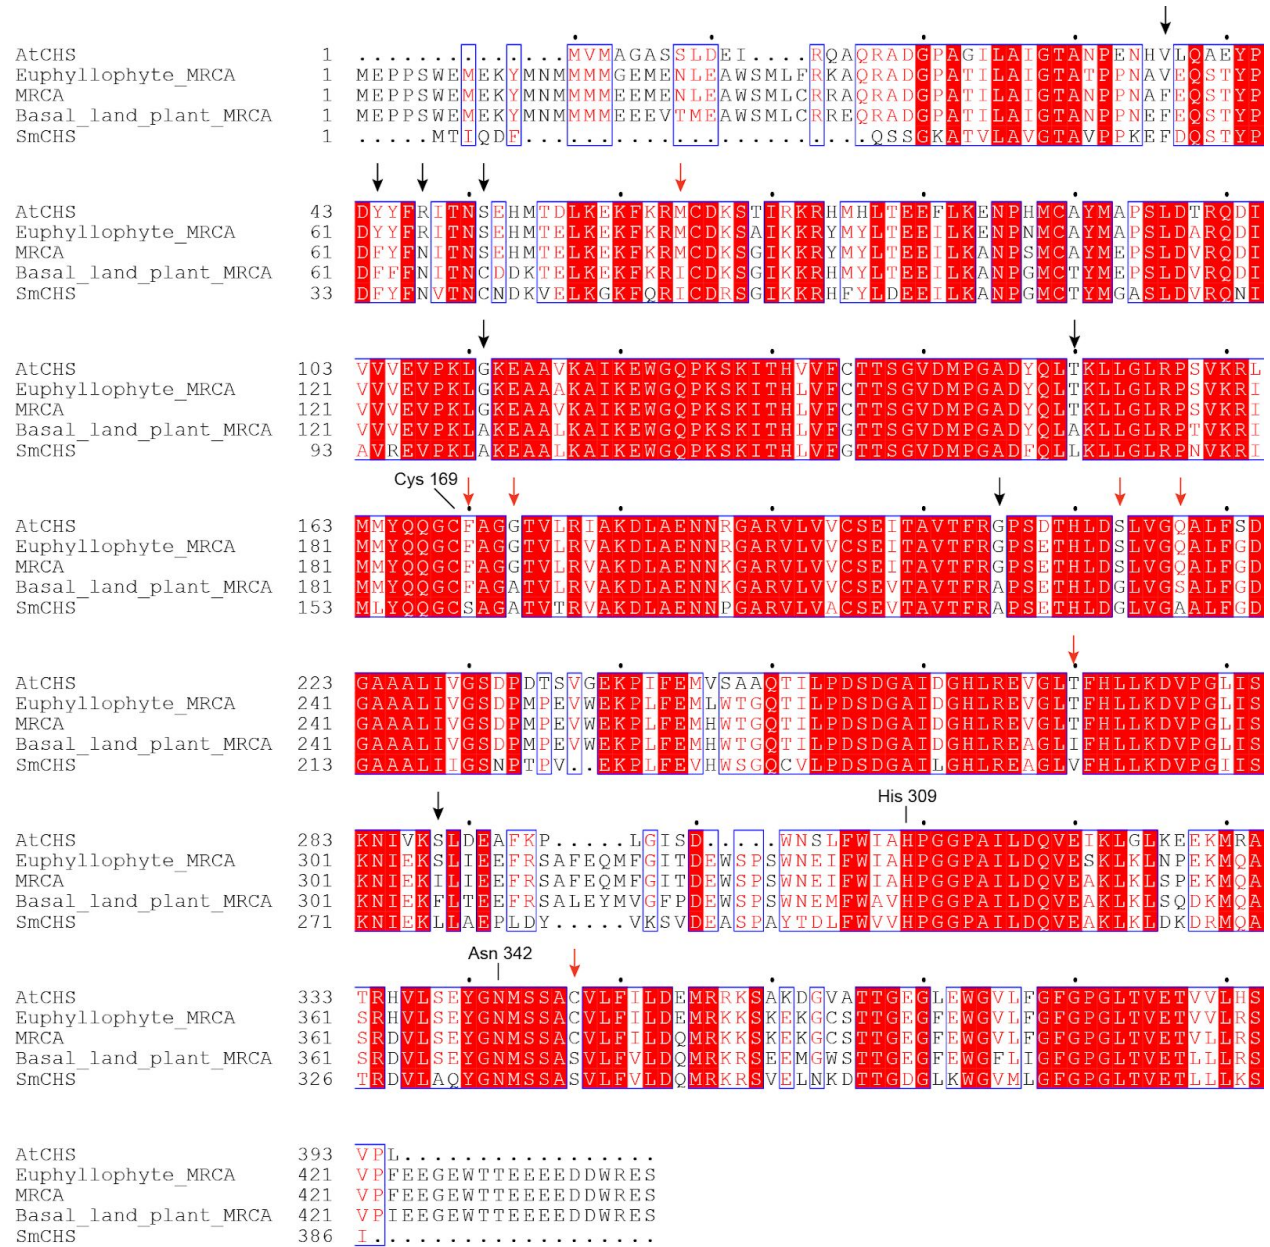

**Figure S6.** CHS ancestral sequence reconstruction. Sequences and phylogenetic tree of CHSs shown in Figure 1 were used to perform ancestral sequence construction with FastML. The most recent common ancestor (MRCA) sequences of all branches, euphylllophyte, and basal land plant clades are compared to AtCHS and SmCHS. Among the five sequences shown, absolutely conserved residues are shown in white text with red background. Residues with > 70% similarity are shown in red text and white background and blue outline. Other residues are shown in black text. Red arrows indicate the seven differentially conserved positions previously identified and mutated in the M7 CHS constructs. Black arrows indicate additional residue positions that are differentially conserved between euphylllophyte and basal-plant CHSs and determined to have possible functional impact based on their position in the CHS crystal structure. The catalytic triad residues are also labeled.

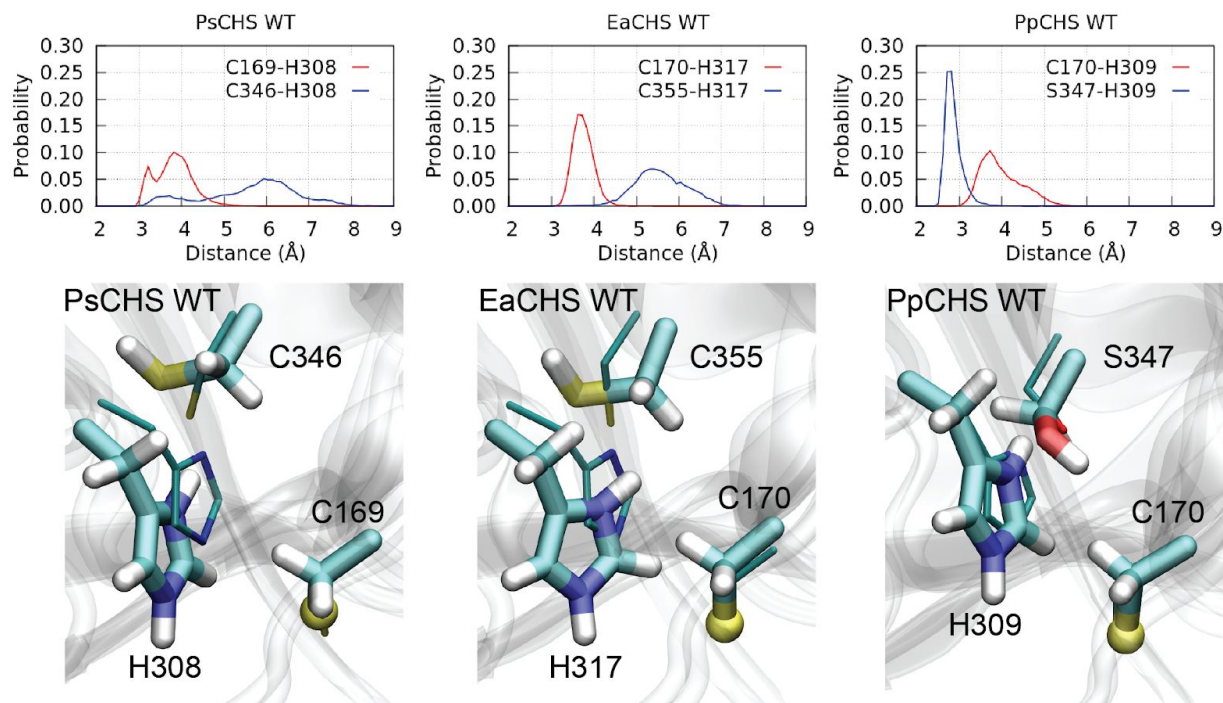

**Figure S7.** Distributions of inter-residue distances and the largest cluster conformations of EaCHS, PpCHS, PsCHS obtained from MD simulations. The observation of a serine forming a more stable hydrogen bond interaction than cysteine with the catalytic histidine is similar to the AtCHS and SmCHS wild-type and mutant simulations (Figure 5). Notably, with the rather weak interaction between the cysteine C346/C355 and the catalytic histidine, the latter moves more freely and often shows a much larger displacement from the corresponding position in the crystal structure (thin sticks).

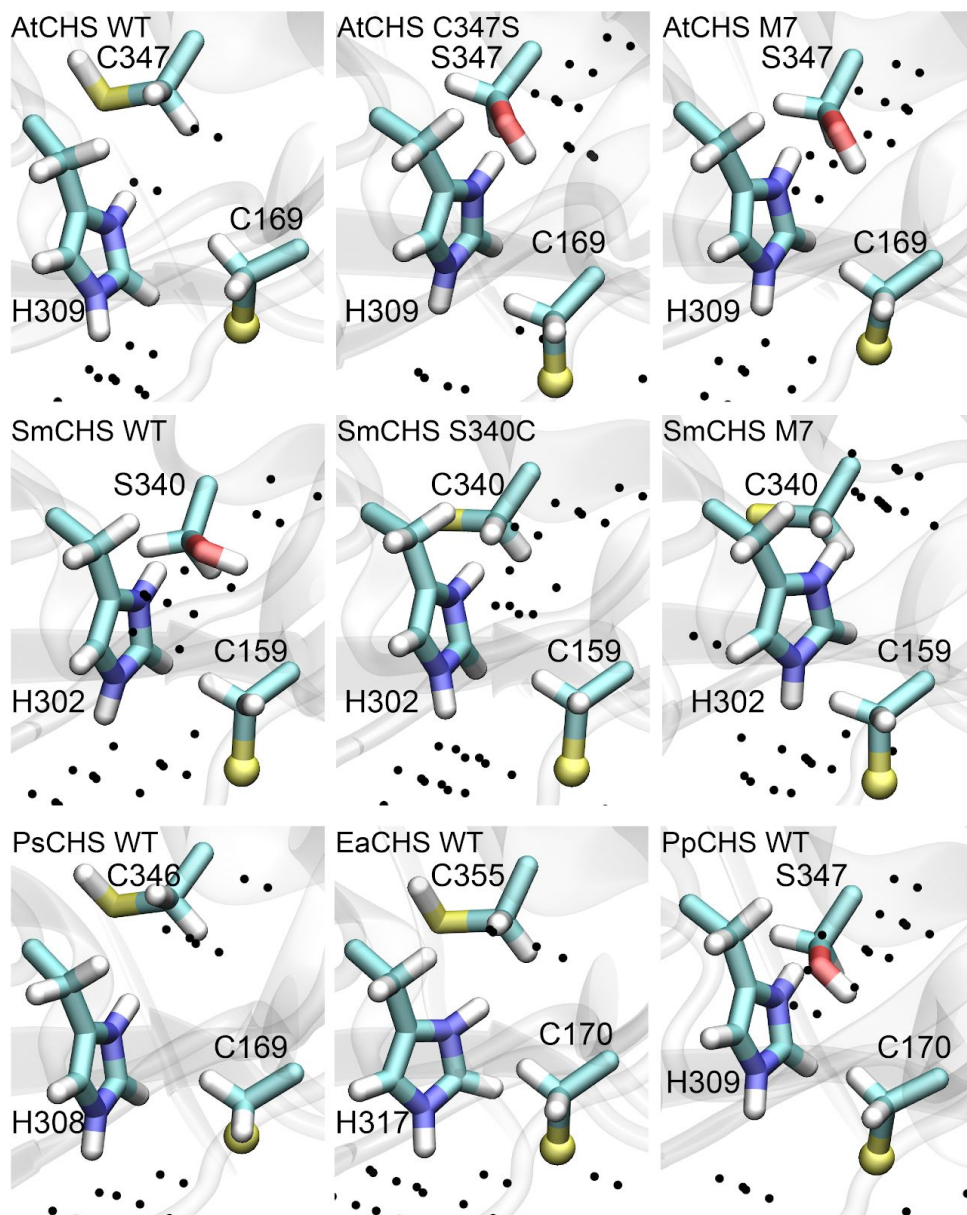

**Figure S8.** Average occupancy of water molecules obtained from MD simulations. Black dots represent grid points with an average water occupancy greater than 0.2. SmCHS in general has more water inside the active site, while the wild-type AtCHS has fewer water molecules. AtCHS mutants gradually attract more water around S347. This pattern is also observed in PpCHS, which also attracts more water around its serine than CHS where the serine is replaced by a cysteine (EaCHS, PsCHS). See also Supporting Note below.

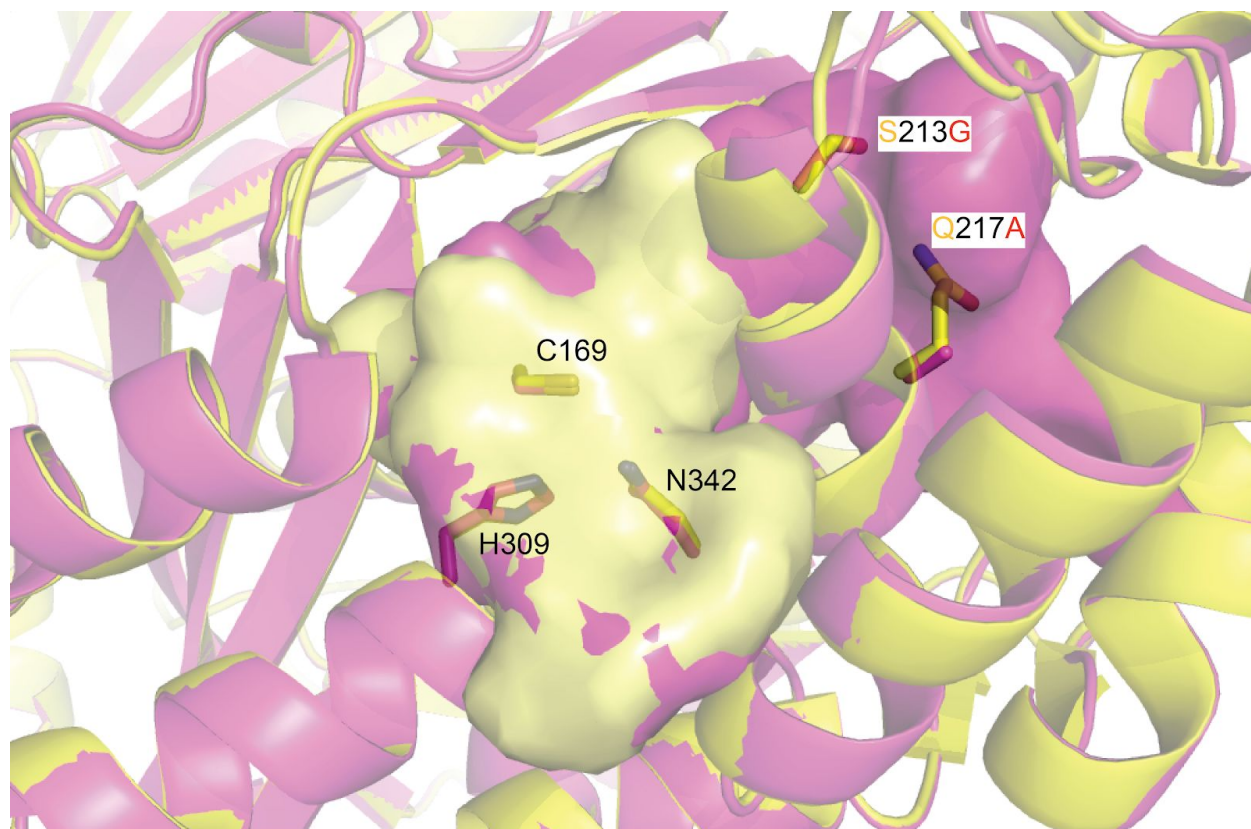

**Figure S9.** Comparison of wild-type AtCHS (yellow) and AtCHS M7 (yellow) crystal structures. The catalytic triad residues and two of the seven mutations from wild-type to M7 are modelled as sticks and labeled. The yellow and magenta surfaces represent the solvent-accessible cavities measured using the cavity-finding program KVFinder. The helix containing the two marked mutations is shifted in AtCHS M7 compared to wild type, leading to a larger active-site cavity.

## Supporting Note

Our MD calculations show that the C347S substitution (AtCHS numbering) can significantly affect active-site solvation. The occupancy of water molecules within the active site was measured with a resolution of  $1 \text{ \AA}^3$  (Figure S8). Interestingly, S347 in AtCHS C347S and M7 mutants attracts more water toward itself and H309. Similarly, the wild-type SmCHS is also considerably wetter than the wild-type AtCHS: employing a cylinder with a radius of  $9 \text{ \AA}$  and a height of  $13 \text{ \AA}$  to enclose the catalytic residues, we found that the average number of water molecules enclosed was 40.0 for SmCHS and 31.4 for AtCHS. The ability of a serine to attract more water is also observed in simulations of EaCHS, PpCHS, and PsCHS, although in SmCHS mutants the active site remains rather wet despite the mutation of serine to cysteine (Figure S8).

AtCHS M7 also showed a wider active-site opening than wild-type AtCHS, which may also affect solvent access to the active site, as shown by the large cavity found in cavity analysis. In addition to changing the hydrogen bonding network, the decreased solvation in euphyllophyte CHSs would enhance the  $pK_a$ -lowering effect of the histidine, because ionic effects are enhanced as the dielectric constant decreases along with solvent polarity (1).

## Supporting References

1. Harris, T. K., and Turner, G. J. (2002) Structural basis of perturbed  $pK_a$  values of catalytic groups in enzyme active sites. *IUBMB Life*. **53**, 85–98
